# Supplementary material for: Population Genomics of Commercial Fish Sebastes schlegelii of the Bohai and Yellow Seas (China) Using a Large SNP Panel from GBS
Source: MDPI journal article supplement (doi:10.3390/genes15050534), 2024-04-24
Supplement: s1 [file s1]

**Table S1.** The number of SNPs per filtering step

| Filtering steps                                              | The numbers of SNPs |
|--------------------------------------------------------------|---------------------|
| SNPs presented in both two pipelines among three populations | 157,167             |
| SNPs after filtering step2                                   | 157,082             |
| SNPs after filtering step3                                   | 156,864             |
| SNPs after filtering step4                                   | 156,863             |
| SNPs after filtering step5                                   | 153,154             |
| SNPs after filtering step6                                   | 149,434             |
